# Supplementary material for: Poly(ethylene oxide) grafted silica nanoparticles: efficient routes of synthesis with associated colloidal stability
Source: Royal Society of Chemistry journal article supplement (doi:10.1039/d1sm00678a), 2021-01-01
Supplement: d1sm00678a1.pdf [file d1sm00678a1.pdf]

# Supporting Information

## **Poly(ethylene oxide) grafted silica nanoparticles: efficient routes of synthesis with associated colloidal stability**

Sébastien Issa<sup>a</sup>, Fabrice Cousin<sup>b,\*</sup>, Marine Bonnevide<sup>c</sup>, Didier Gigmes<sup>a</sup>, Jacques Jestin<sup>b</sup>, Trang N. T. Phan<sup>a\*</sup>

<sup>a</sup> Aix Marseille Univ, CNRS, Institut de Chimie Radicalaire, UMR 7273-Campus Scientifique St Jérôme, Service 542, 13397 Marseille Cedex 20, France.

<sup>b</sup> Laboratoire Léon Brillouin, UMR 12, Université Paris-Saclay, IRAMIS/CEA Saclay, 91191 Gif-sur-Yvette Cedex, France.

<sup>c</sup> Manufacture Française des Pneumatiques MICHELIN, Site de Ladoux, 23 place des Carmes Déchaux, F-63 040 Clermont-Ferrand, Cedex 9, France.

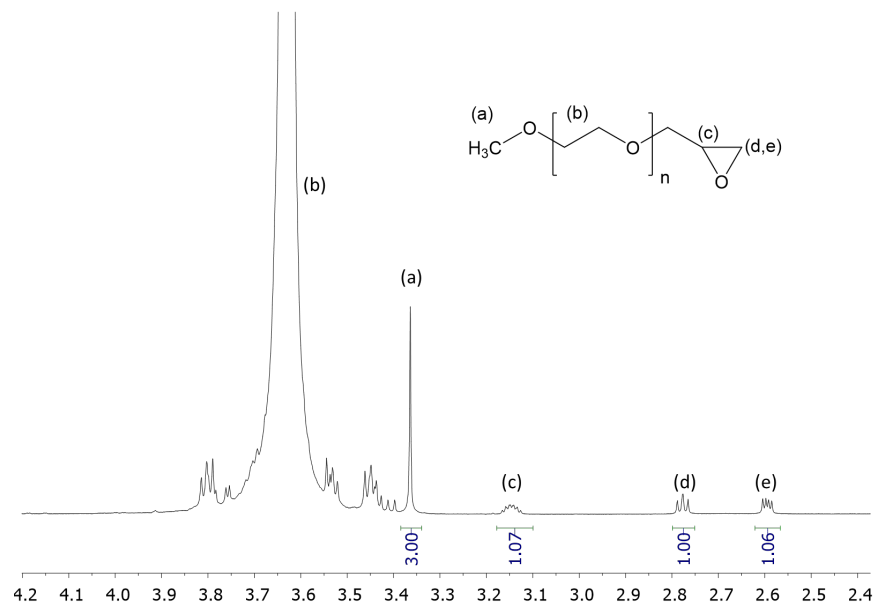

**Figure S1.** <sup>1</sup>H NMR spectrum of α-methoxy-ω-epoxy poly(ethylene oxide) of 5000 g mol<sup>-1</sup> in CDCl<sub>3</sub>.

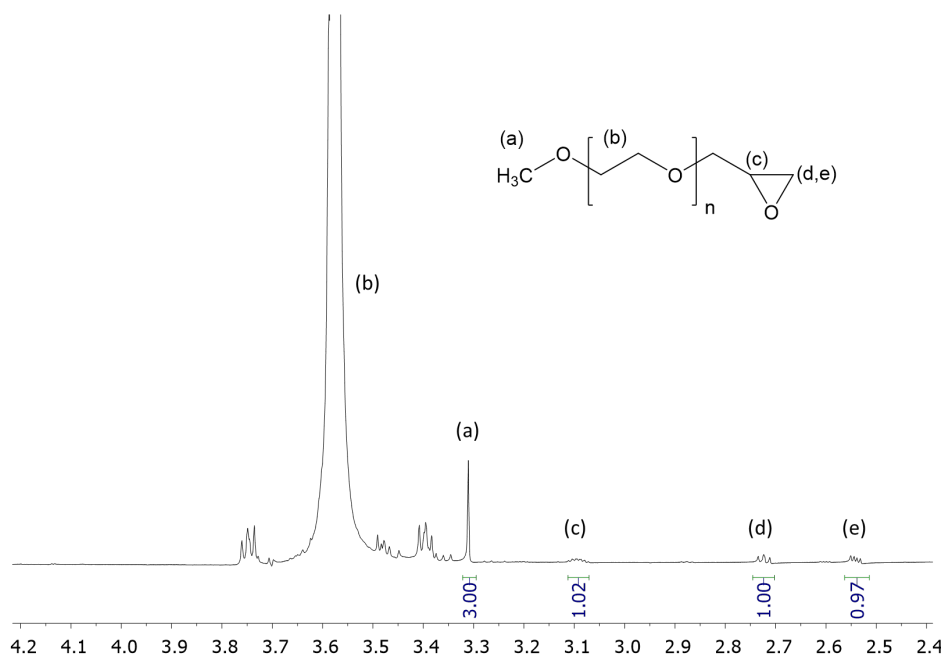

**Figure S2.** <sup>1</sup>H NMR spectrum of α-methoxy-ω-epoxy poly(ethylene oxide) of 10000 g mol<sup>-1</sup> in CDCl<sub>3</sub>.

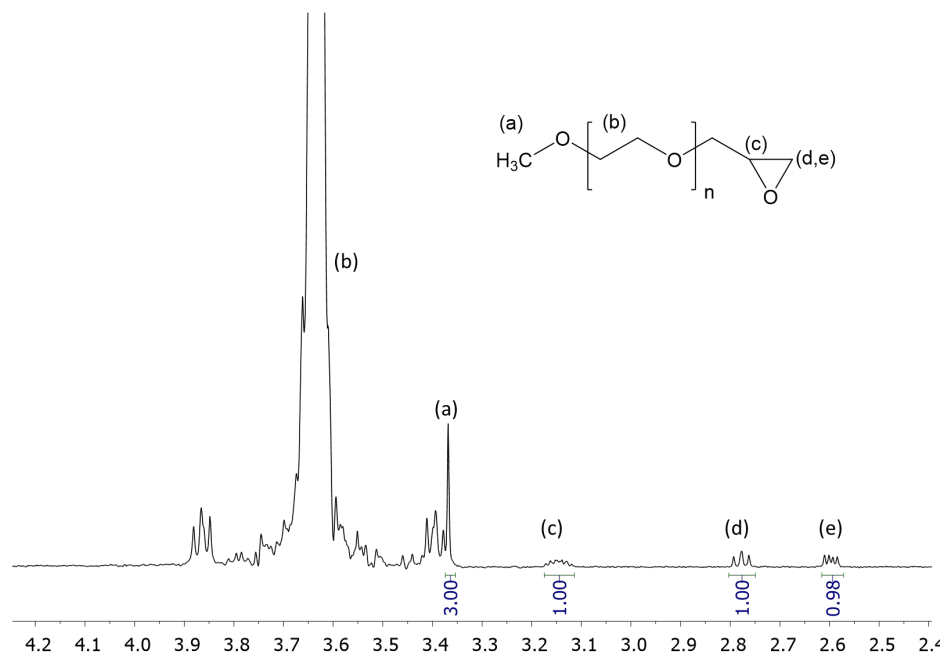

**Figure S3.** <sup>1</sup>H NMR spectrum of α-methoxy-ω-epoxy poly(ethylene oxide) of 20000 g mol<sup>-1</sup> in CDCl<sub>3</sub>.

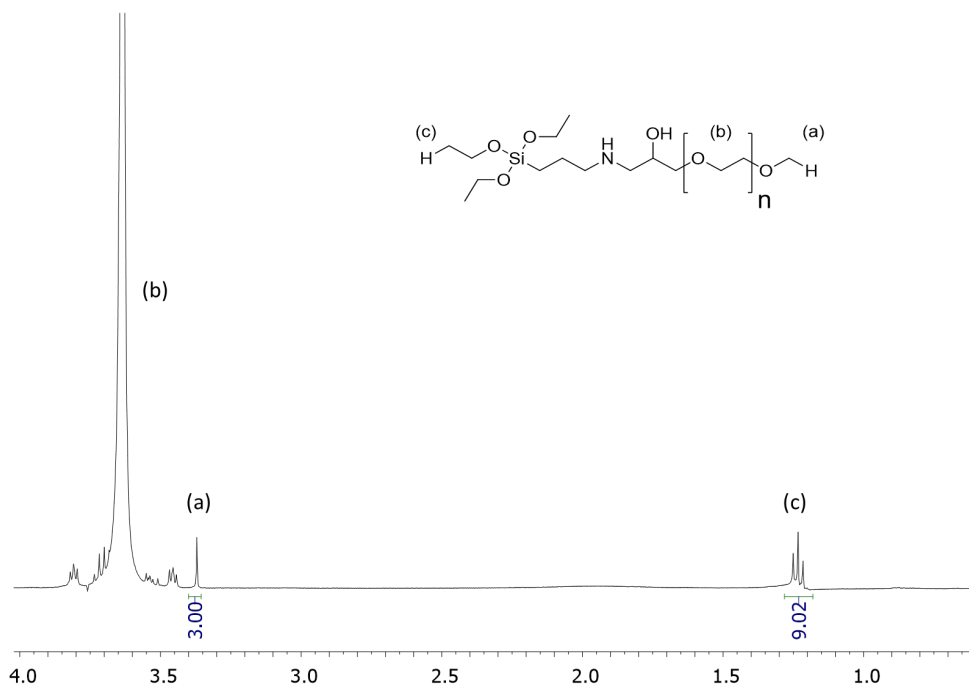

**Figure S4.** <sup>1</sup>H NMR spectrum of α-methoxy-ω-triethoxysilane poly(ethylene oxide) of 10000 g mol<sup>-1</sup> in CDCl<sub>3</sub>.

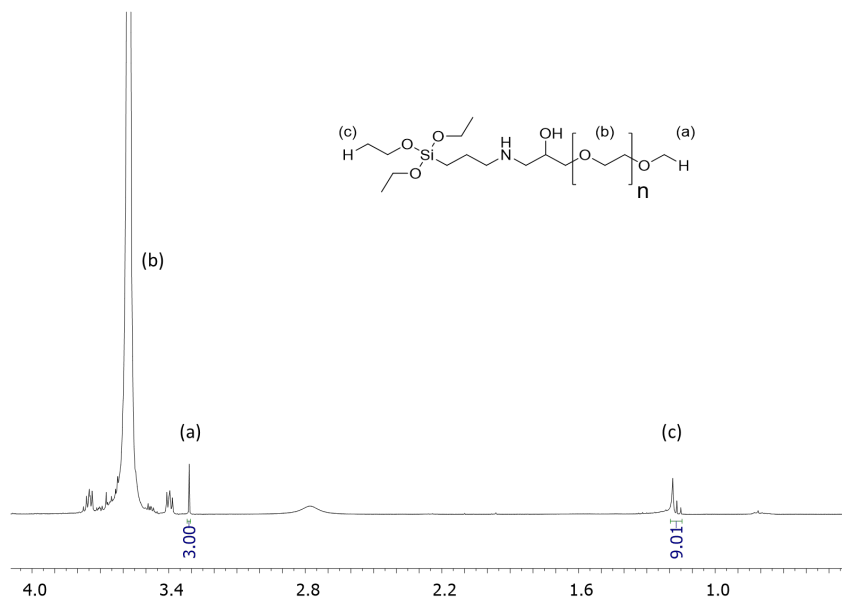

**Figure S5.**  $^1\text{H}$  NMR spectrum of  $\alpha$ -methoxy- $\omega$ -triethoxysilane poly(ethylene oxide) of 20000 g  $\text{mol}^{-1}$  in  $\text{CDCl}_3$ .

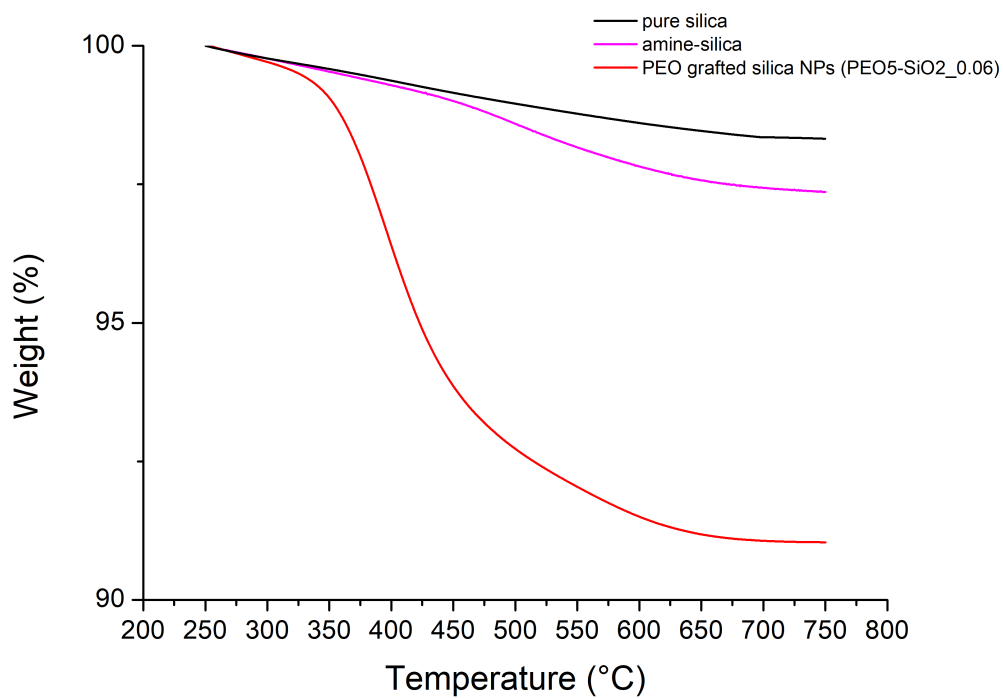

**Figure S6.** TGA curves of unmodified silica (black), amine-silica (pink) and PEO-grafted silica (red).

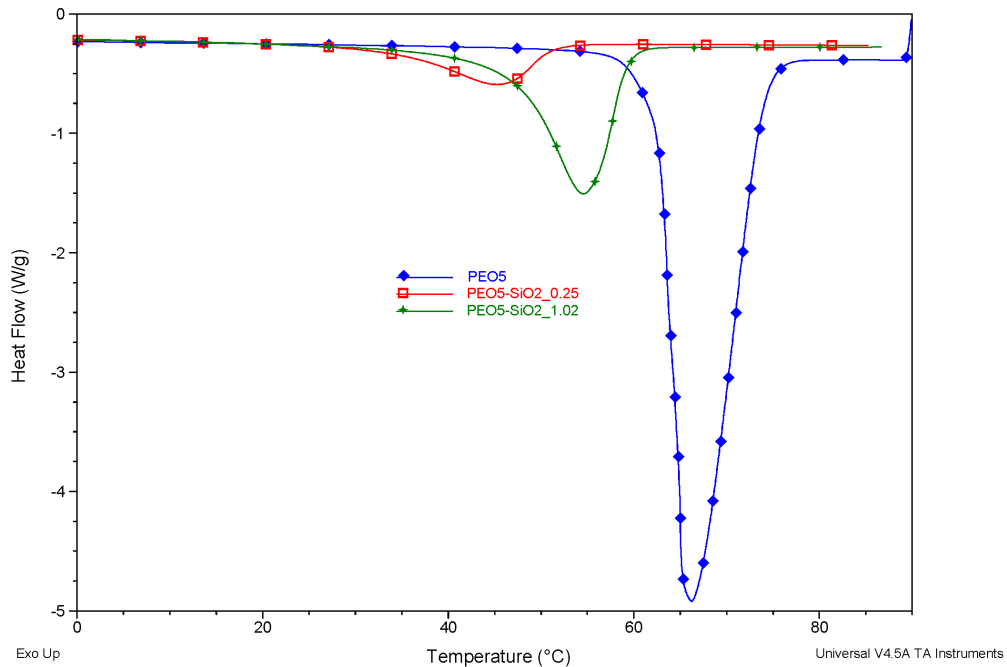

**Figure S7.** DSC heating traces, recording at a heating rate of  $10\text{ }^{\circ}\text{C min}^{-1}$  of PEO of  $5000\text{ g mol}^{-1}$  grafted silica nanoparticle series: raw PEO of  $5000\text{ g mol}^{-1}$  ( $\blacklozenge$ ); PEO5-SiO<sub>2</sub>\_0.25 ( $\square$ ); PEO5-SiO<sub>2</sub>\_1.02( $\blacktriangledown$ ).

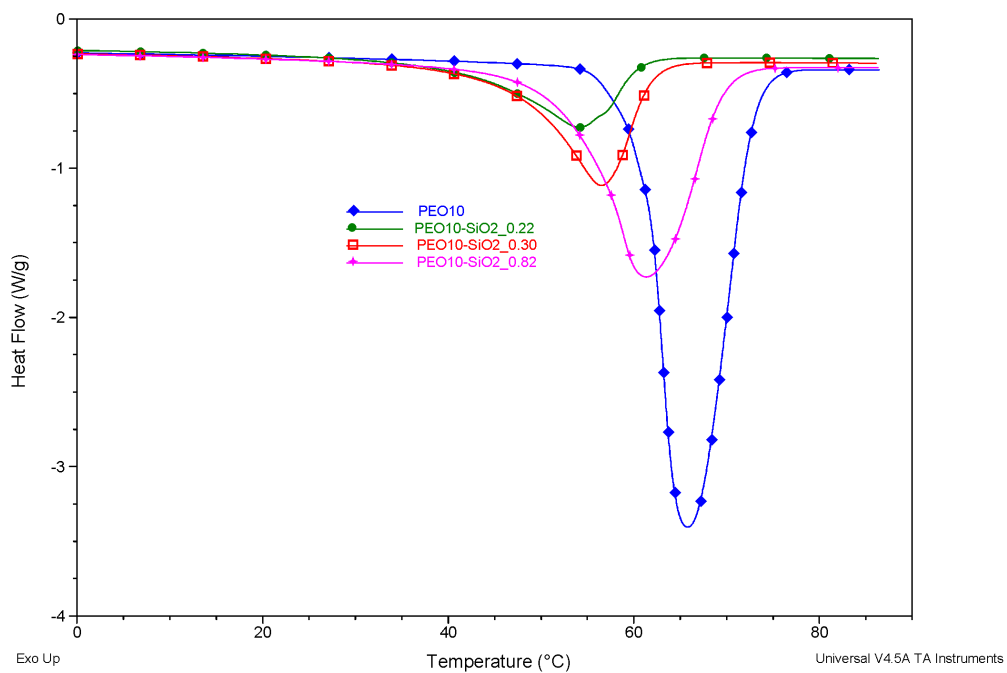

**Figure S8.** DSC heating traces, recording at a heating rate of  $10\text{ }^{\circ}\text{C min}^{-1}$  of PEO of  $10000\text{ g mol}^{-1}$  grafted silica nanoparticles series: raw PEO of  $10000\text{ g mol}^{-1}$  ( $\blacklozenge$ ); PEO10-SiO<sub>2</sub>\_0.22 ( $\bullet$ ); PEO10-SiO<sub>2</sub>\_0.30 ( $\square$ ); PEO10-SiO<sub>2</sub>\_0.82 ( $\blackplus$ ).

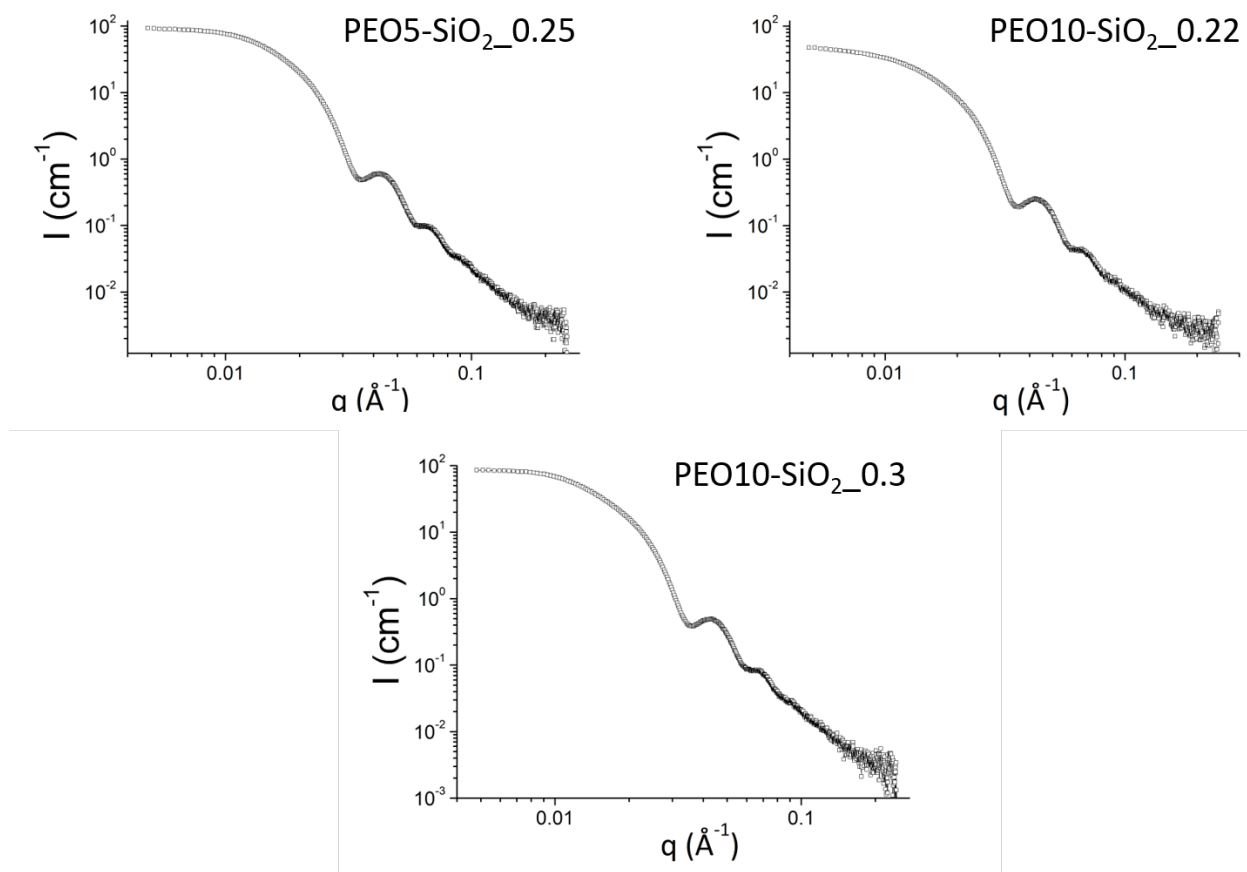

**Figure S9:** Scattering intensities obtained by SAXS for MPEO of 5000, 10000  $\text{g mol}^{-1}$  grafted onto the silica NPs in DMAc at different grafting densities.

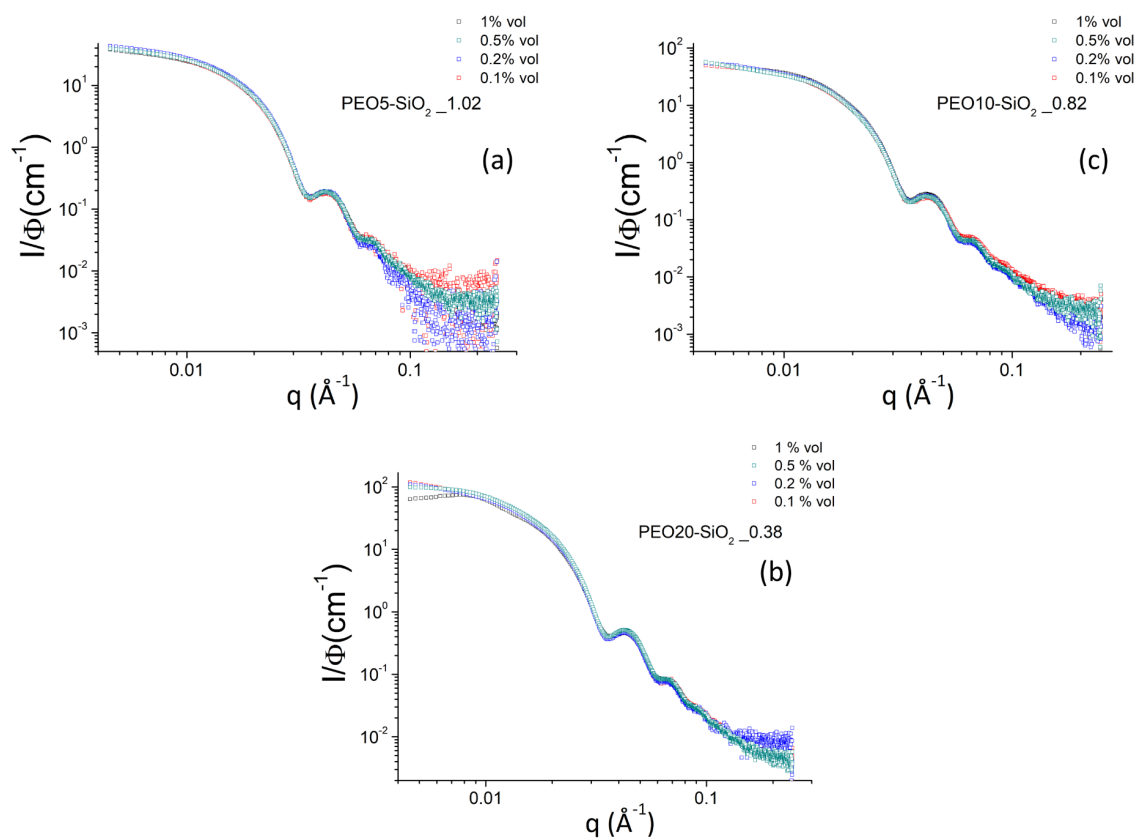

**Figure S10.** (a) - (c) Scattering intensities obtained by SAXS for MPEO of 5000, 10000 and 20000  $\text{g}\cdot\text{mol}^{-1}$  grafted onto silica NPs in DMAc at different nanoparticle volume fraction. The scattering intensities are normalized by the corresponding nanoparticle volume fraction.



**Table S1.** Nanoparticles mean distances calculated by either the position of the correlation peak ( $2\pi/q^*$  ; with  $q^*$  the position of the correlation peak) or the volume fraction ( $(2R_0) (\pi/6\Phi)^{1/3}$ ) for a series of MPEO of  $5000 \text{ g mol}^{-1}$  grafted onto the silica NPs in DMAc at different grafting densities. The grafting was performed according to protocol 1.

| Sample                      | $\Phi$ | $q^* (\text{\AA}^{-1})$ | $d_{\text{mean}} (2\pi/q^*) (\text{\AA})$ | $d_{\text{mean}} (2R_0) (\pi/6\Phi)^{1/3} (\text{\AA})$ |
|-----------------------------|--------|-------------------------|-------------------------------------------|---------------------------------------------------------|
| PEO5-SiO <sub>2</sub> _0.06 | 0.017  | 0.0091                  | 690                                       | 815.0                                                   |
| PEO5-SiO <sub>2</sub> _0.09 | 0.020  | 0.0085                  | 739                                       | 772.0                                                   |
| PEO5-SiO <sub>2</sub> _0.12 | 0.028  | 0.0108                  | 582                                       | 690                                                     |
